# Supplementary material for: Hydrogen-bonded 1D nanotubes and 2D layers of group 12 metal complexes with a pyridylurea ligand
Source: Royal Society of Chemistry journal article supplement (doi:10.1039/c2ce25453k), 2012-01-01
Supplement: c2ce25453k.pdf [file c2ce25453k.pdf]

*Electronic Supplementary Information*

## Hydrogen-bonded 1D nanotubes and 2D layers of group 12 metal complexes with a pyridylurea ligand

Zaiwen Yang,<sup>ac</sup> Xiaojuan Huang,<sup>a</sup> Qilong Zhao,<sup>ac</sup> Shaoguang Li<sup>ac</sup> and Biao Wu<sup>\*ab</sup>

<sup>a</sup> State Key Laboratory for Oxo Synthesis & Selective Oxidation, Lanzhou Institute of Chemical Physics, CAS, Lanzhou 730000, China

<sup>b</sup> College of Chemistry and Materials Science, Northwest University, Xi'an 710069, China. E-mail: wubiao@nwu.edu.cn

<sup>c</sup> Graduate University of Chinese Academy of Sciences, Beijing 100049, China

Table S1. Selected  $\pi$ -stacking interactions and torsion angles of the ligand molecules in **1–6**.

| compound                                                              | parameters of $\pi$ - $\pi$ stacking |                    |                                                   | torsion angles of two L arms (°)<br>(C3–C2 <sub>py</sub> –N2–C6 <sub>urea</sub> ,<br>C8–C7 <sub>naphthyl</sub> –N3–C6 <sub>urea</sub> ;<br>C19–C18 <sub>py</sub> –N5–C22 <sub>urea</sub> ,<br>C24–C23 <sub>naphthyl</sub> –N6–C22 <sub>urea</sub> ) |
|-----------------------------------------------------------------------|--------------------------------------|--------------------|---------------------------------------------------|-----------------------------------------------------------------------------------------------------------------------------------------------------------------------------------------------------------------------------------------------------|
|                                                                       | centroid–centroid separation (Å)     | dihedral angle (°) | vertical displacements between ring centroids (Å) |                                                                                                                                                                                                                                                     |
| [ZnCl <sub>2</sub> L <sub>2</sub> ]·H <sub>2</sub> O ( <b>1</b> )     | 3.483                                | 2.24               | 0.456, 0.546                                      | 146.20, 67.63; –13.88, 28.78                                                                                                                                                                                                                        |
| [ZnBr <sub>2</sub> L <sub>2</sub> ]·0.75EtOH ( <b>2a</b> )            | 3.569                                | 3.25               | 0.891, 1.104                                      | 30.32, –63.85; –33.83, 60.23                                                                                                                                                                                                                        |
| [ZnBr <sub>2</sub> L <sub>2</sub> ]·0.8H <sub>2</sub> O ( <b>2b</b> ) | 3.799                                | 5.98               | 1.337, 1.674                                      | –30.64, 64.95; 29.66, –57.74                                                                                                                                                                                                                        |
| [ZnI <sub>2</sub> L <sub>2</sub> ] ( <b>3</b> )                       | 3.675                                | 7.20               | 0.719, 1.148                                      | 131.32, 46.60; 18.73, –68.55                                                                                                                                                                                                                        |
| [HgCl <sub>2</sub> L <sub>2</sub> ] ( <b>4</b> )                      | 3.665                                | 7.06               | 0.703, 1.128                                      | –141.53, 47.80; 173.00, –87.53                                                                                                                                                                                                                      |
| [HgBr <sub>2</sub> L <sub>2</sub> ] ( <b>5</b> )                      | 3.743                                | 6.00               | 1.376, 1.727                                      | –142.60, 51.17; 177.75, –81.36                                                                                                                                                                                                                      |
| [HgI <sub>2</sub> L] ( <b>6</b> )                                     | 3.733                                | 5.66               | 1.476, 1.178                                      | 134.70, 35.83                                                                                                                                                                                                                                       |

Table S2. Selected hydrogen bond parameters (Å, °) for **1–6**.

| Compound  | D–H···A      | H···A    | D···A     | ∠D–H···A |
|-----------|--------------|----------|-----------|----------|
| <b>1</b>  | N5–H5B···O3  | 2.08     | 2.889(6)  | 157      |
|           | N6–H6A···O3  | 2.12     | 2.930(5)  | 157      |
|           | O3–H3D···O1  | 1.87 (2) | 2.701(6)  | 175      |
|           | O3–H3C···O2  | 1.95 (3) | 2.775(6)  | 166      |
|           | N2–H2A···Cl2 | 2.53     | 3.320(4)  | 154      |
|           | N3–H3B···Cl2 | 2.50     | 3.317(5)  | 159      |
| <b>2a</b> | N2–H2A···O3  | 2.51     | 3.187(12) | 136      |
|           | N3–H3B···O2  | 1.95     | 2.810(8)  | 178      |
|           | N5–H5B···O1  | 2.15     | 2.954(6)  | 154      |
|           | N6–H6A···O1  | 2.27     | 3.018(7)  | 145      |
| <b>2b</b> | N3–H3B···O2  | 1.94     | 2.797(13) | 176      |
|           | N5–H5B···O1  | 2.11     | 2.920(10) | 156      |
|           | N6–H6A···O1  | 2.19     | 2.955(11) | 148      |
| <b>3</b>  | N2–H2A···O1  | 1.95     | 2.743(6)  | 153      |
|           | N3–H3B···O1  | 1.97     | 2.770(6)  | 154      |
|           | N5–H5B···O2  | 2.09     | 2.887(6)  | 155      |
|           | N6–H6A···O2  | 2.31     | 3.044(6)  | 144      |
| <b>4</b>  | N2–H2B···O2  | 1.98     | 2.841(5)  | 166      |
|           | N3–H3B···O2  | 2.61     | 3.340(5)  | 142      |
|           | N5–H5B···O1  | 2.37     | 3.120(5)  | 145      |
|           | N6–H6B···O1  | 2.10     | 2.907(4)  | 153      |
| <b>5</b>  | N2–H2B···O2  | 1.99     | 2.831(4)  | 166      |
|           | N3–H3B···O2  | 2.56     | 3.275(4)  | 142      |
|           | N5–H5B···O1  | 2.36     | 3.105(4)  | 145      |
|           | N6–H6B···O1  | 2.11     | 2.902(4)  | 153      |
| <b>6</b>  | N2–H2B···O   | 2.07     | 2.863(5)  | 154      |
|           | N3–H3B···O   | 2.08     | 2.866(5)  | 152      |

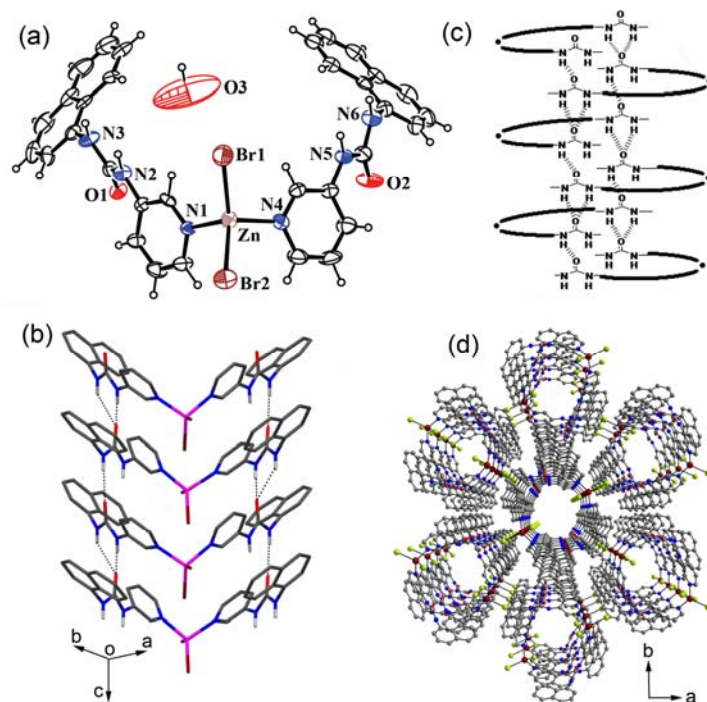

**Fig. S1** (a) Molecular structure of [ZnBr<sub>2</sub>L<sub>2</sub>]·0.8H<sub>2</sub>O (**2b**); (b) The urea self-association in **2b**; (c) Schematic representation of the self-assembly of the semi-macrocylic [ZnBr<sub>2</sub>L<sub>2</sub>] synthons into a nanotube; (d) Packing diagram of the 1D H-bonded nanotubes viewed down the *c* axis. Guest solvent molecules and non-urea hydrogen atoms are omitted for clarity. Selected bond lengths (Å) and angles (°): Zn–N1, 2.056(8); Zn–N4, 2.038(8); Zn–Br1, 2.325(2); Zn–Br2, 2.3361(16); N1–Zn–Br1, 109.3(2); Br1–Zn–Br2, 124.05(8).
